# Supplementary material for: Relationship between Changes in Intestinal Microorganisms and Effect of High Temperature on the Growth and Development of Bombyx mori Larvae
Source: MDPI journal article supplement (doi:10.3390/ijms231810289), 2022-09-07
Supplement: s1 [file s1]

# Relationship between changes in intestinal microorganisms and effect of high temperature on the growth and development of *Bombyx mori* larvae

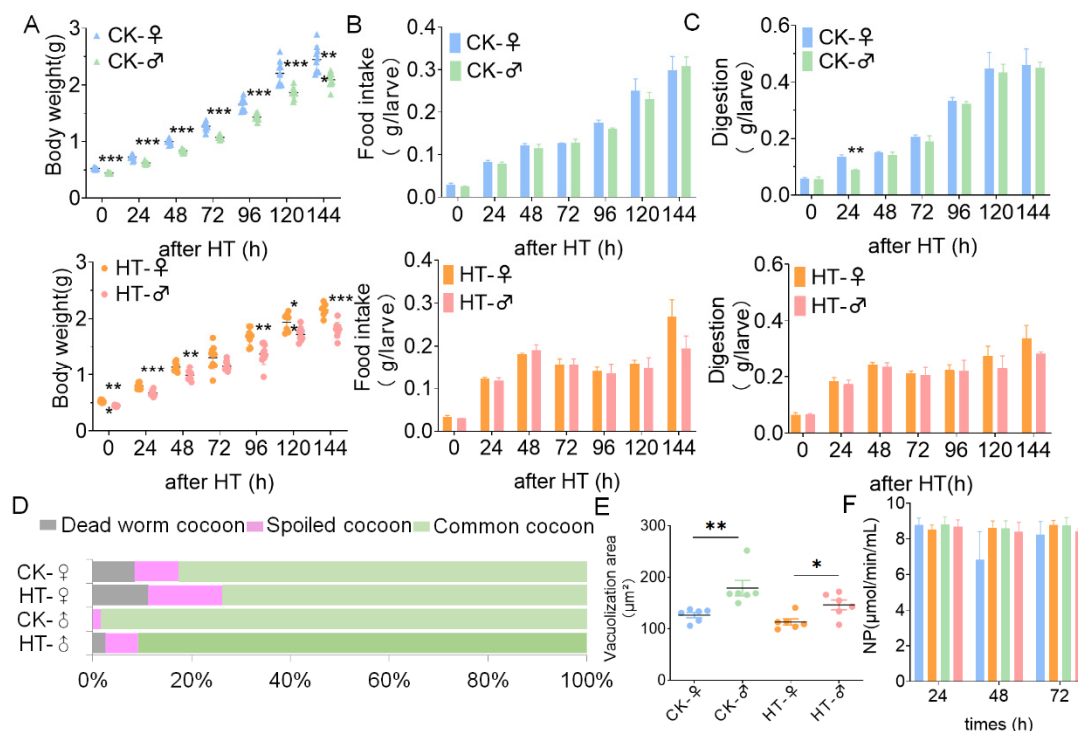

**Figure S1. Investigation on growth and physiological indexes of silkworm.** (A) Investigation of silkworm weight,  $n \geq 7$ . (B) Food intake capacity of the larvae (grams per larva). (C) Digestion capacity of the larvae (grams per larva). (D) The statistical results of the number of dead cages, ordinary cocoons, and crumb cocoons,  $N=3$ ,  $n=11-24$ . (E) Quantitative results of vacuolation of midgut tissue cells in the CK group and HT group (72 h). (F) Protease activity in digestive juice during high-temperature treatment. \*,  $P \leq 0.05$ ; \*\*,  $P \leq 0.01$ ; \*\*\*,  $P \leq 0.001$ . CK, control group; after HT, high-temperature treatment.

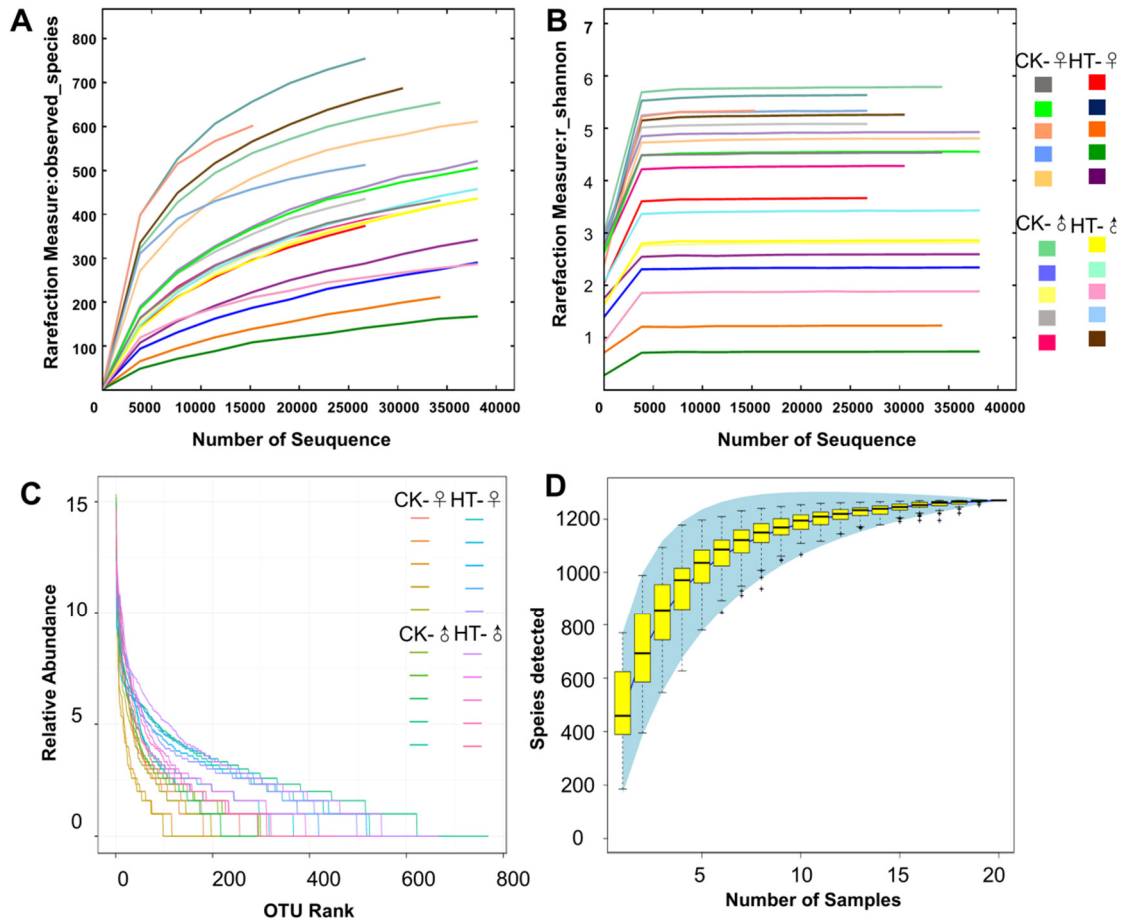

**Figure S2. Alpha Diversity analysis of silkworm gut microbiota.** (A) Rarefaction curve of samples. Each curve represents a sample, when the curve tends to be gentle, it indicates that the amount of sequencing data at this time is reasonable. (B) Shannon-wiener of samples. Each curve represents a sample, the initial curve straight climb is due to the number of sequencing is far from covering the samples, the value rises until the smooth description shows that the number of sequencing is sufficient to cover most of the microbiota in the samples. (C) Rank-abundance of samples. Each curve represents a sample, abscissa indicates species abundance, the ordinate indicates the proportion of the abundance of the species (the log2 value), the wider the curve on the horizontal axis, the richer the composition of the species. (D) Species accumulation curves of samples. Applicable to the same type of sample number > 10, the curve tends to mean that the species in this environment will not increase significantly with the increase in samples size.

**Table S1.** Alpha diversity index calculation results.

| Samples | Valid reads | OTU    | Chao1 | ACE      | Simpson | Shannon |
|---------|-------------|--------|-------|----------|---------|---------|
| NT-♀1   | 37494       | 1978   | 276   | 418.9323 | 0.9150  | 4.4708  |
| NT-♀2   | 41011       | 2304   | 305   | 420.0586 | 0.9044  | 4.4765  |
| NT-♀3   | 21463       | 2798   | 517   | 517.0000 | 0.8300  | 5.2810  |
| NT-♀4   | 30281       | 2295   | 418   | 450.3528 | 0.9155  | 5.2936  |
| NT-♀5   | 42607       | 2759   | 425   | 502.2482 | 0.8821  | 4.7307  |
| Average | 34571.2     | 2426.8 | 388.2 | 461.7184 | 0.8894  | 4.8505  |
| NT-♂1   | 38747       | 2953   | 493   | 614.6606 | 0.9498  | 5.7269  |
| NT-♂2   | 45761       | 2449   | 310   | 464.5643 | 0.9337  | 4.8480  |
| NT-♂3   | 42799       | 2018   | 236   | 322.8468 | 0.5863  | 2.7219  |
| NT-♂4   | 30367       | 2037   | 311   | 516.7521 | 0.9446  | 5.0364  |
| NT-♂5   | 33061       | 1836   | 288   | 409.7647 | 0.8684  | 4.2315  |
| Average | 38147       | 2258.6 | 327.6 | 465.7177 | 0.8566  | 4.5129  |
| HT-♀1   | 29972       | 1760   | 255   | 439.1805 | 0.8204  | 3.6102  |

|         |         |        |       |          |        |        |
|---------|---------|--------|-------|----------|--------|--------|
| HT-♀2   | 48807   | 1488   | 130   | 190.7999 | 0.5576 | 2.2694 |
| HT-♀3   | 36308   | 968    | 100   | 174.6254 | 0.2951 | 1.1745 |
| HT-♀4   | 45913   | 833    | 72    | 120.8025 | 0.1567 | 0.6864 |
| HT-♀5   | 38527   | 1563   | 162   | 259.2756 | 0.6929 | 2.5172 |
| Average | 39905.4 | 1322.4 | 143.8 | 236.9368 | 0.5045 | 2.0515 |
| HT-♂1   | 40567   | 1998   | 220   | 382.0341 | 0.6633 | 2.7595 |
| HT-♂2   | 38575   | 2055   | 247   | 372.3733 | 0.7656 | 3.3434 |
| HT-♂3   | 47780   | 1400   | 171   | 215.7520 | 0.3671 | 1.8287 |
| HT-♂4   | 30821   | 3360   | 621   | 767.5486 | 0.9098 | 5.5862 |
| HT-♂5   | 31720   | 3030   | 523   | 678.3814 | 0.9171 | 5.1966 |
| Average | 37892.6 | 2368.6 | 356.4 | 483.2179 | 0.7246 | 3.7429 |
